# Supplementary material
Source: Springer Nature journal article supplement (https://www.springermedizin.de/resource/supplementary/13587_2013_56_MOESM1_ESM.pdf/9677226)

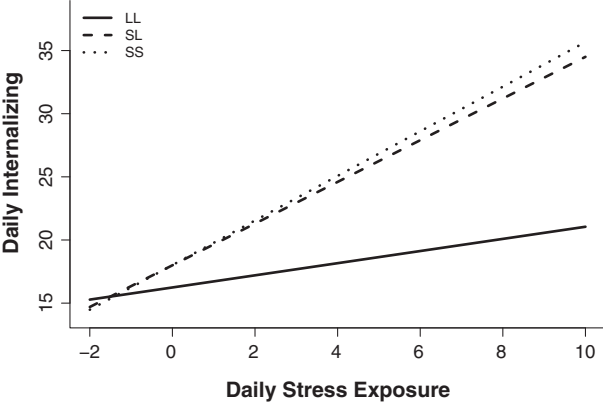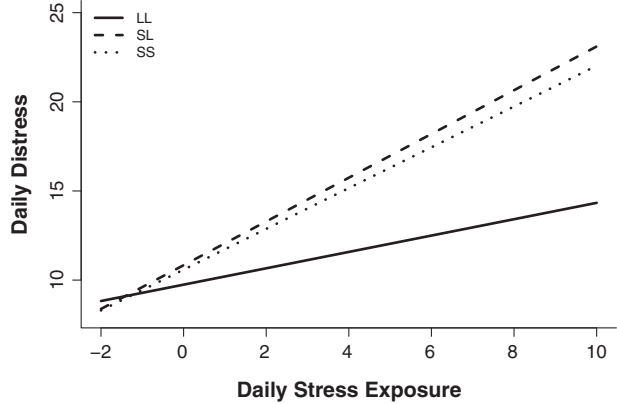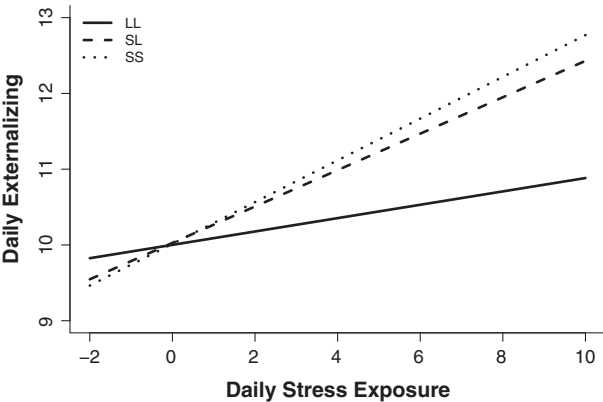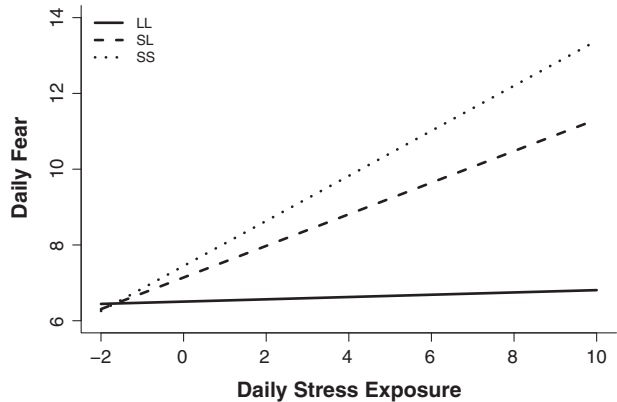

Supplement: MOESM1 [file 9677226]
